# Supplementary material for: ADAMTS10-mediated tissue disruption in Weill–Marchesani syndrome
Source: PubMed Central journal article supplement (PMC6196651; doi:10.1093/hmg/ddy276), 2018-07-27
Supplement: ddy276_supp.pdf [file ddy276_supp.pdf]

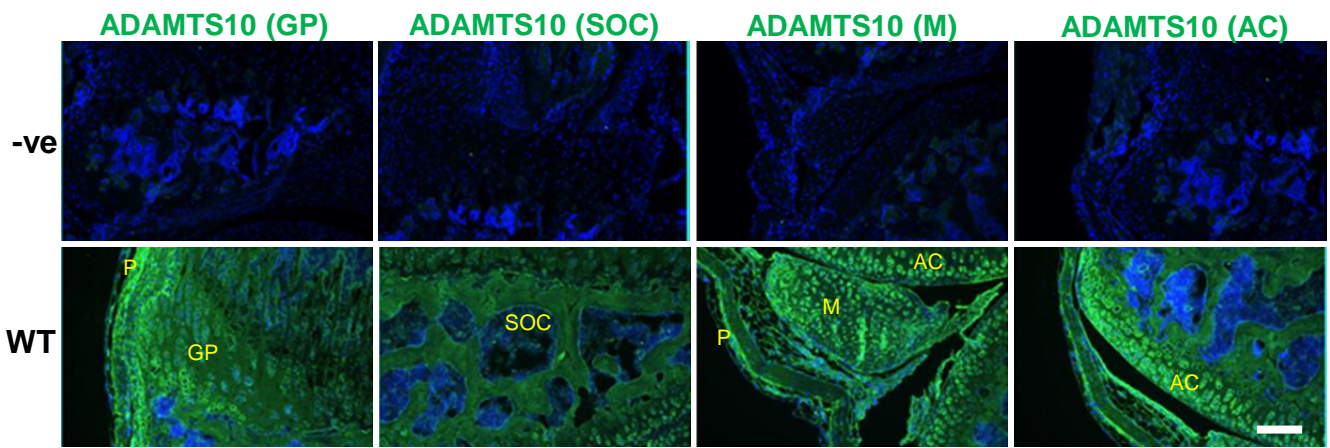

**Supplementary Fig. 2 Localisation of ADAMTS10 in the mouse knee joint.** IF microscopy of the 3 week-old mouse knee joint structures stained with ADAMTS10 (green) and DAPI (blue) in the growth plate – GP, perichondrium - P, meniscus – M, secondary ossification centres – SOC, articular cartilage – AC. ADAMTS10 is predominantly expressed in the articular cartilage, perichondrium and meniscus but also present in the secondary ossification centres and growth plate. No background staining was present on negative controls (-ve), scale bar=200  $\mu$ m.

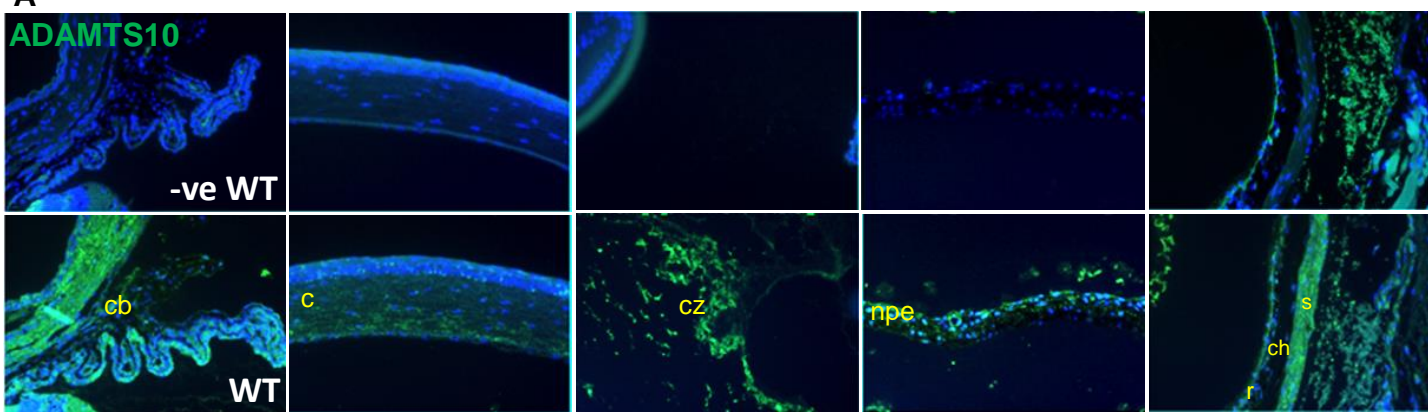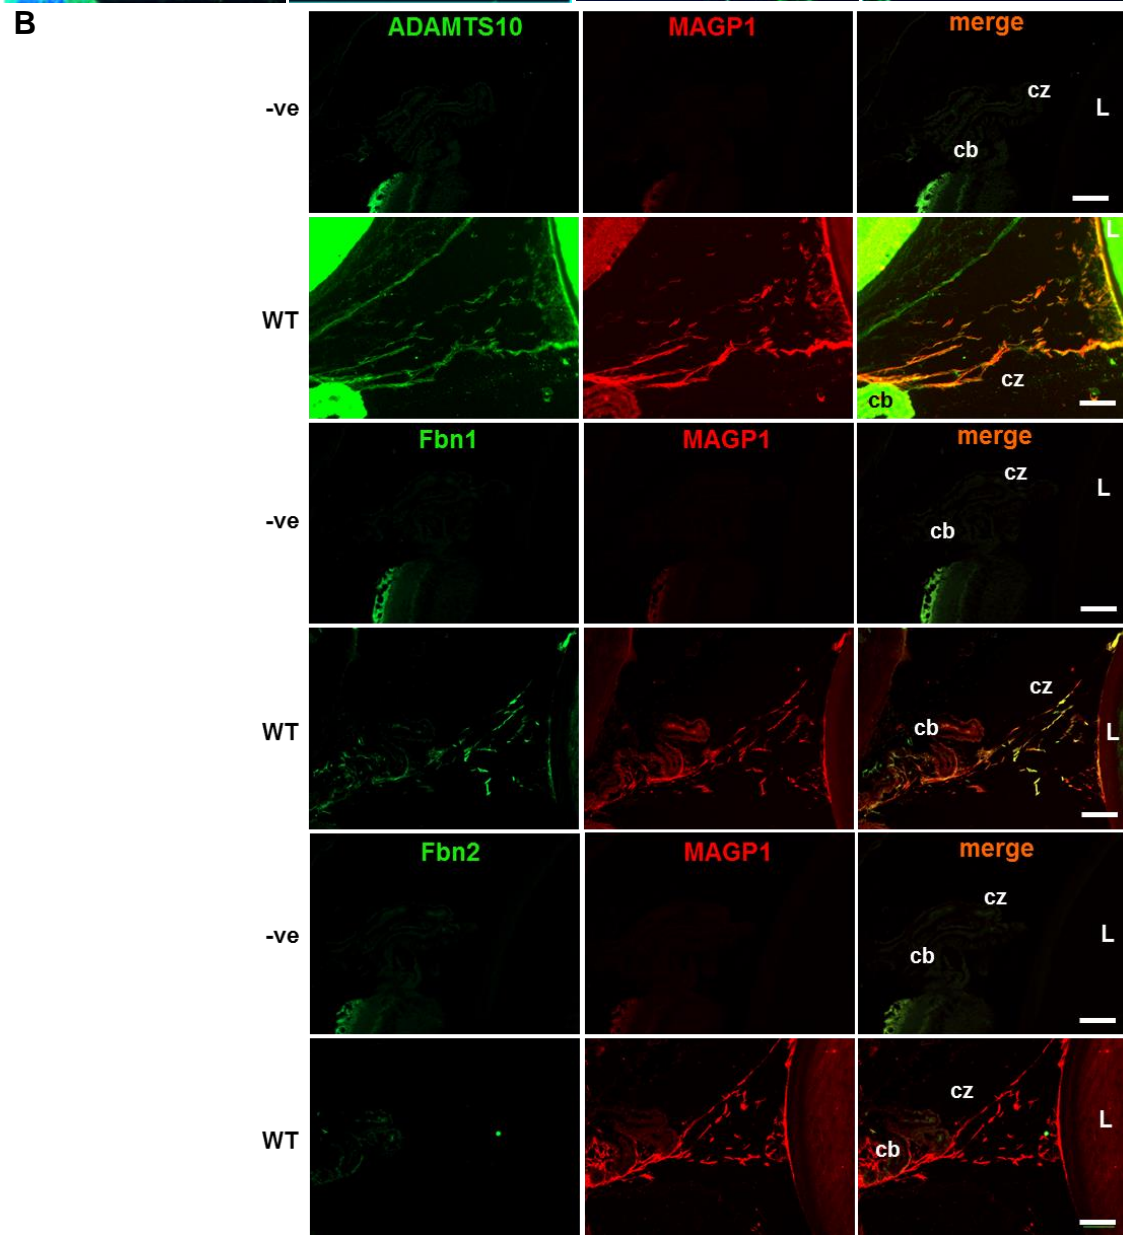

**Supplementary Fig. 3A) Localisation of ADAMTS10 protein within the mouse eye structures.** Immunohistochemical staining of ADAMTS10 protein (green) and DAPI (blue) in the 3 month-old WT ciliary body (cb), ciliary zonule (cz), non-pigmented epithelium (npe), retina (r), sclera (s), choroid (ch). No ADAMTS10 (green) staining detected in the cb and cz with some autofluorescent background staining around the sclera in the negative control (-ve), scale bar=50  $\mu$ m. **B) Negative control (-ve) images for IF images shown in Fig. 5.**

WT

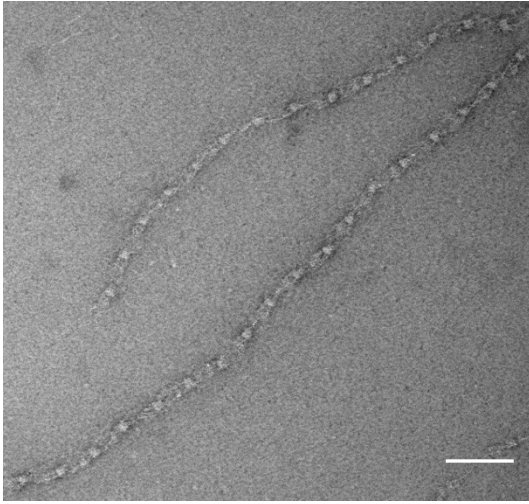

HOM

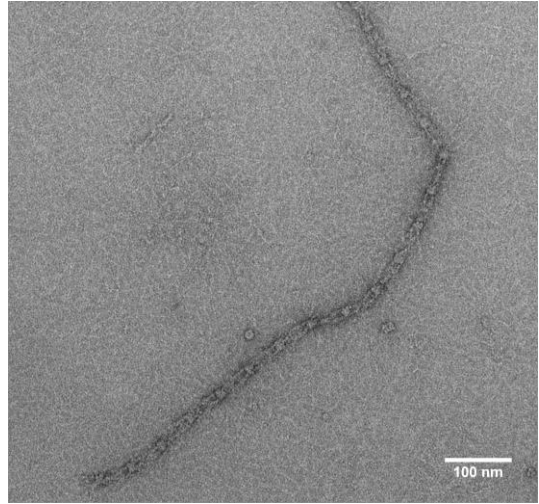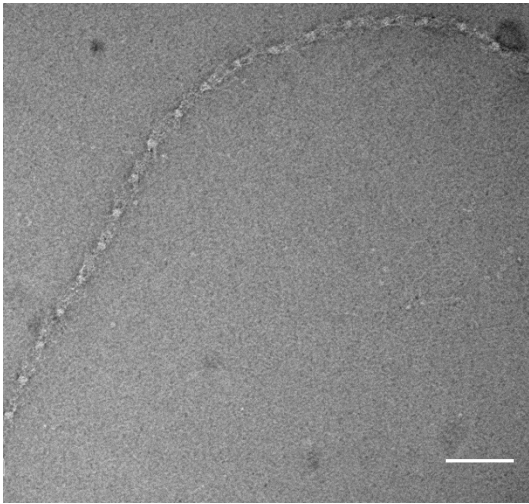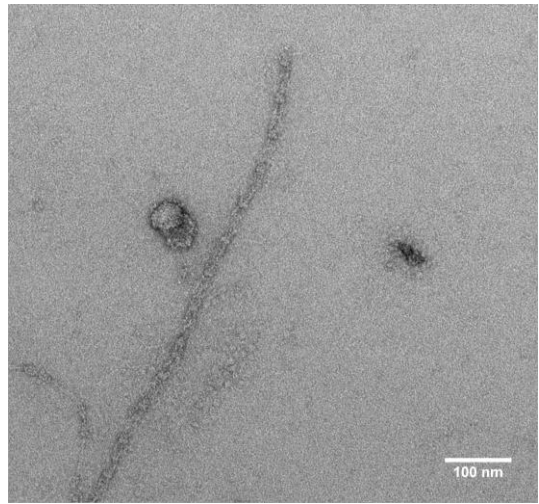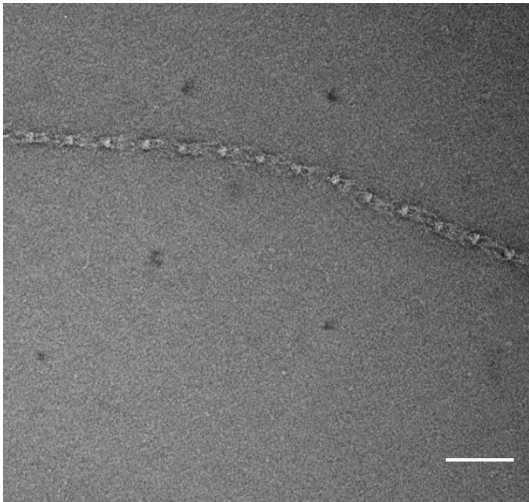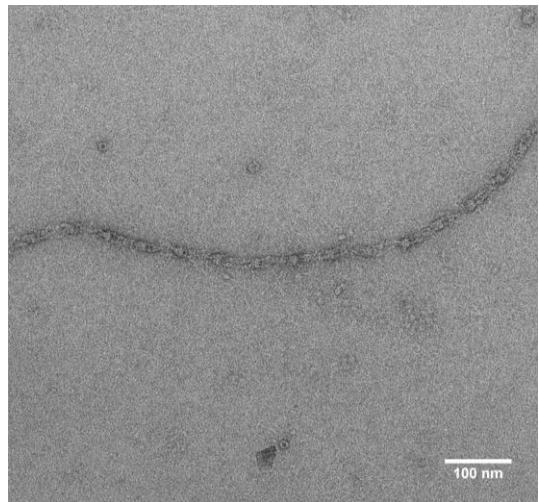

**Supplementary Fig. 4.** Negatively stained TEM images of microfibrils purified from WT and HOM skin. Scale bars = 100 nm.

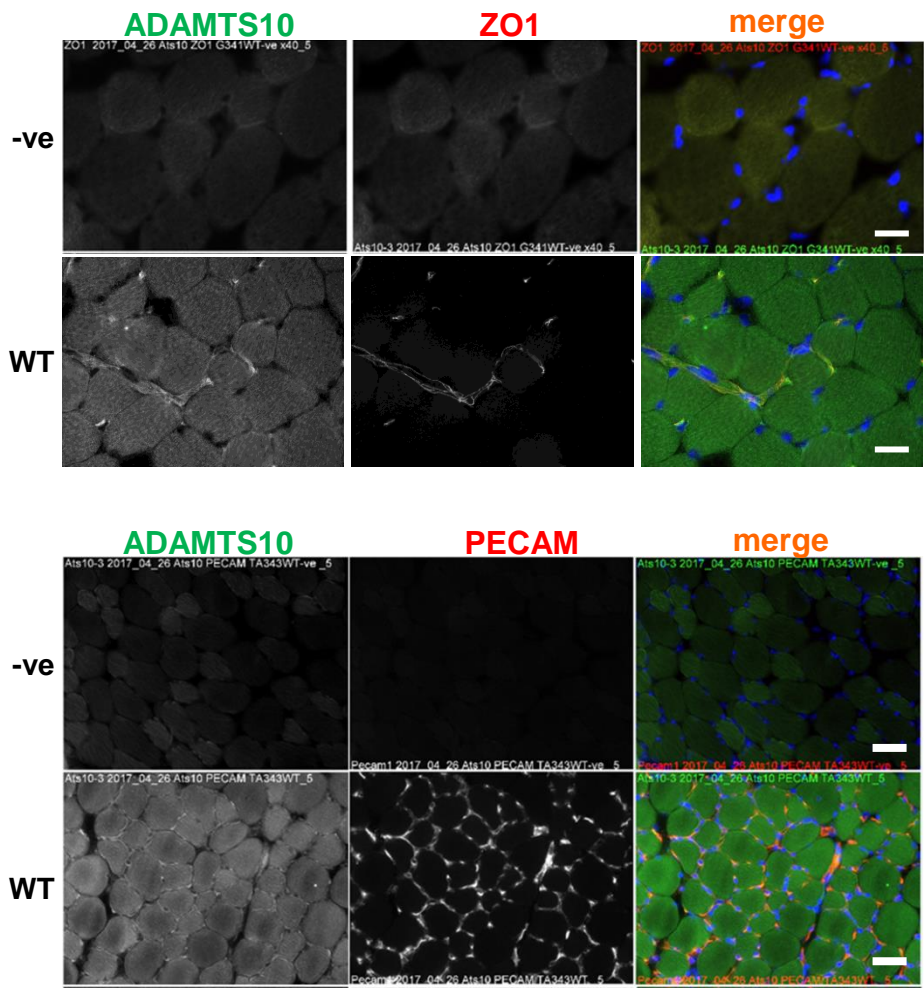

**Supplementary Fig. 5** Negative control (-ve) images for IF images shown in Fig. 6D and E. Scale bars = 50  $\mu$ m.

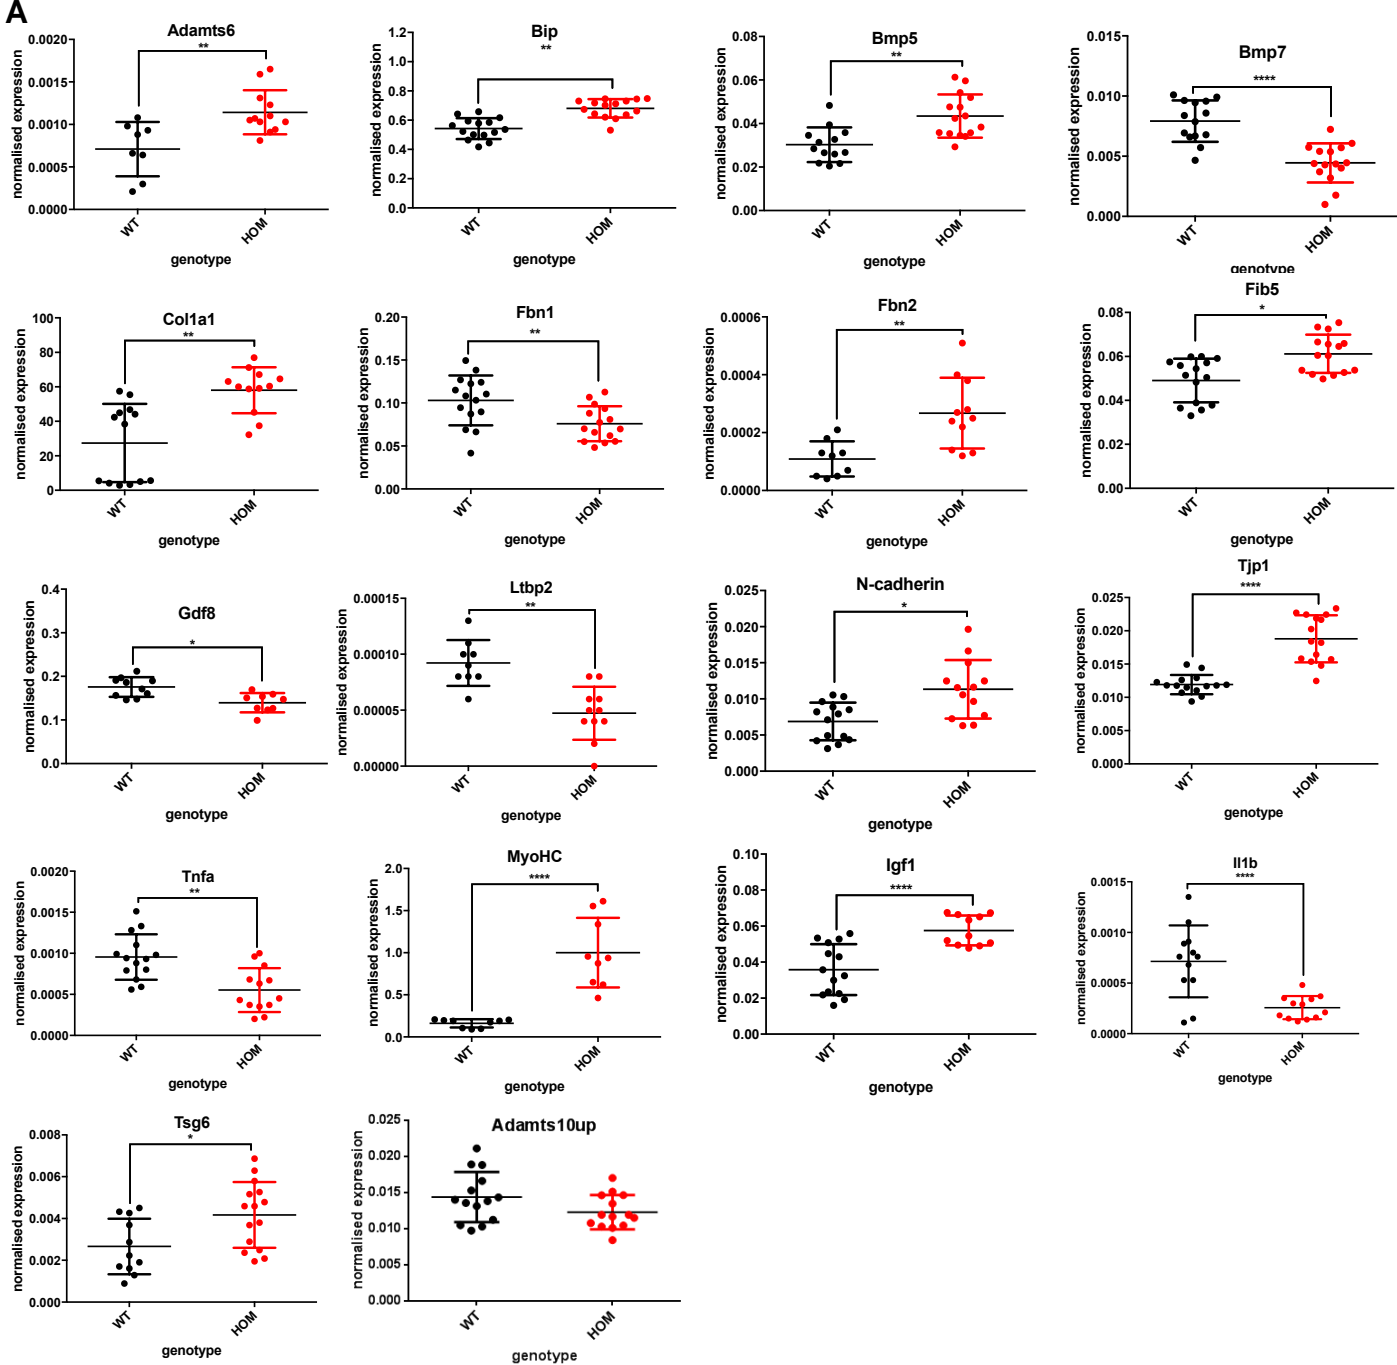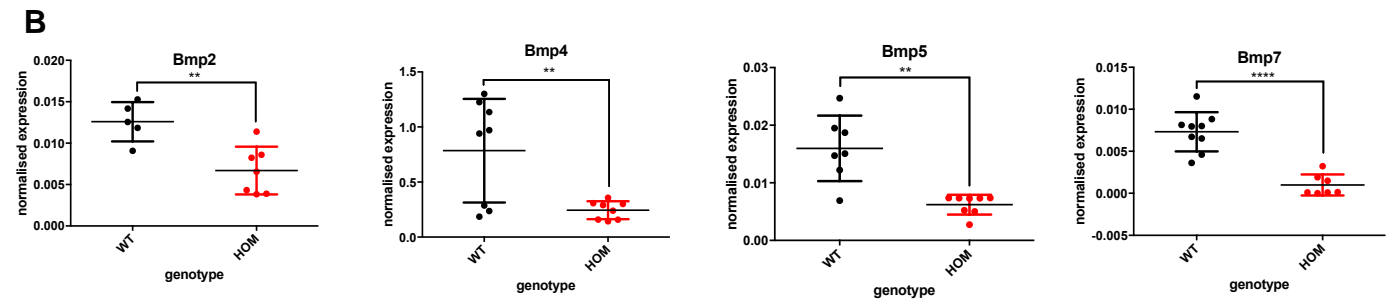

**Supplementary Fig. 6 RT-PCR graphs showing altered gene expression. A) 4 week-old muscles, B) 2D MEFs day 4.** As shown in Supplementary Figure 1A, *Adamts10up* primers are upstream of the mutation as shown in Supplementary Figure 1A.

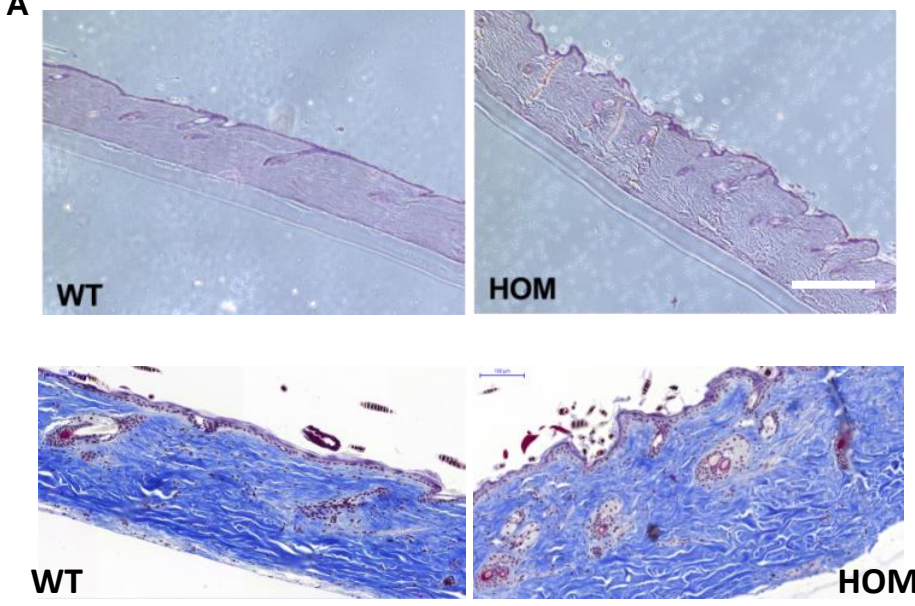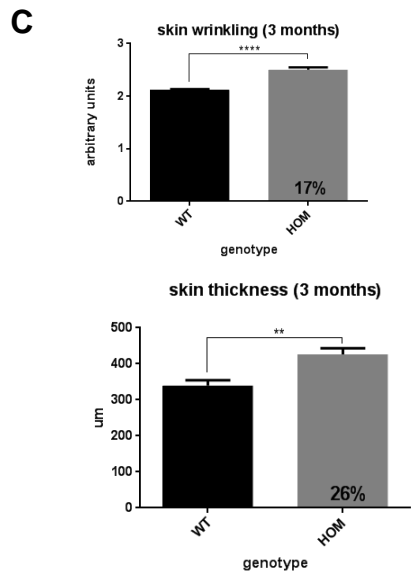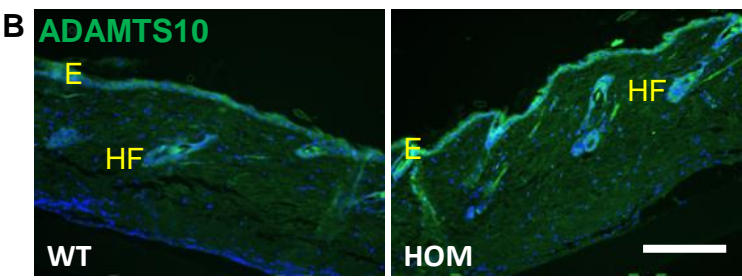

**Supplementary Fig. 7. Increased skin thickness in WMS ADAMTS10<sup>S236X/S236X</sup> skin. A)** H&E (top panel) and Trichrome Masson's (bottom panel) staining of the WT and HOM skin sections. Scale bar =500 µm (top) and 200 µm (bottom). **B)** IF staining of ADAMTS10 (green) and DAPI (blue) of the WT and HOM skin sections with predominant localisation in the epidermis (E) and hair follicles (HF), scale bar=200 µm **C)** Increased skin ruffling and skin thickness in the HOM animal. Statistical significance was calculated using two-tail unpaired Student's test in GraphPad Prism V6. Asterisk indicate P values where \*\*P ≤ 0.01; \*\*\*\*P ≤ 0.0001.

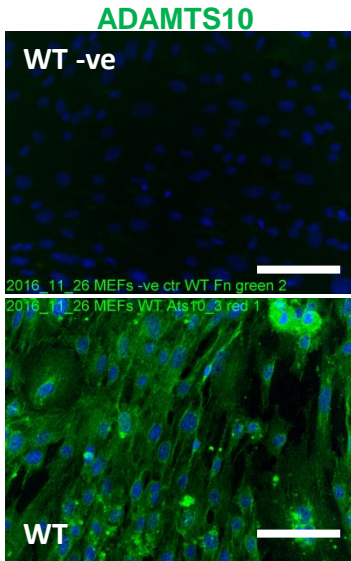

**Supplementary Fig. 8** Localisation of ADAMTS10 protein within MEFs negative control images (-ve) for IF images shown in Fig. 8D. Scale bar=100  $\mu$ m.



**Supplementary Table 1. RT-PCR primer sequences:**

| gene          | primer sequence           |
|---------------|---------------------------|
| Adamts10up F  | gagagtggccccatgtagt       |
| Adamts10up R  | tcatctctcactccacaggct     |
| Adamts10del F | ccaaccattgggggcaagta      |
| Adamts10del R | agccagggtggacagtcattg     |
| Adamts6 F     | aggagctcgctctgtgtaga      |
| Adamts6 R     | ccctatactggaggtggggg      |
| Bip F         | ggcaccttcgatgtgtctcttc    |
| Bip R         | tccatgacccgctgatcaa       |
| Bmp5 F        | ttcaaggcaagcgagggtact     |
| Bmp5 R        | tgcaggctgtttttgttca       |
| Bmp7 F        | ggaagcatgtaagggtcca       |
| Bmp7 R        | ttctggcagacattttcc        |
| Col1a1 F      | cacctacagcaccctgtgg       |
| Col1a1 R      | gggaggcttgggtggtttg       |
| Fbn1 F        | ttcgagtgtagattggct        |
| Fbn1 R        | tggtggcatccagacactca      |
| Fbn2 F        | atacaatgtcggcaaagcct      |
| Fbn2 R        | atggtctaaagtcagctgtccc    |
| Fib5 F        | ccgataccctgggtgcctatt     |
| Fib5 R        | gcactgataggccctgtttg      |
| Fn F          | tgataccggtgtcccagagg      |
| Fn R          | aggccgatgctgaatcagt       |
| Gdf8 F        | tgacagcagtgatggctctt      |
| Gdf8 R        | aagtcagactctgtaggcatgg    |
| Igf1 F        | gaagcctacaaaagcagccc      |
| Igf1 R        | tagggacggggacttctgag      |
| Il1b F        | ccttgtcaagtgctgaagc       |
| Il1b R        | catcactgtcaaaagggtggca    |
| Ltbp2 F       | gagcctcccaaatggatacaga    |
| Ltbp2 R       | ctcatcgatatcagtacagtagtct |
| MyoHC F       | ccaagggcctgaatgaggag      |
| MyoHC R       | gcaaaggctccaggcttgag      |
| N-cad F       | cagccccttcaatgtgaaat      |
| N-cad R       | cttgaaatctgctggctcgc      |
| Sdc4 F        | ccggagagtcgattcgagag      |
| Sdc4 R        | gggagggctccagagaagta      |
| Tjp1 F        | aagcgcagccacaagctatt      |
| Tjp1 R        | tgaggcttctgcttctgttg      |
| Tnfa F        | ttctatggcccagaccctca      |
| Tnfa R        | tggttgctacgacgtggg        |
| Tbp F         | gcacaggagccaagagtgaa      |
| Tbp R         | tagctgggaagcccaacttc      |
| Gapdh F       | ggctcatgaccacagtccat      |
| Gapdh R       | atcacgccacagctttccag      |
